# Supplementary material for: Identification of Breast Cancer Immune Subtypes by Analyzing Bulk Tumor and Single Cell Transcriptomes
Source: Front Cell Dev Biol. 2022 Jan 3;9:781848. doi: 10.3389/fcell.2021.781848 (PMC8762338; doi:10.3389/fcell.2021.781848)
Supplement: Supplementary file 1 [file Table2.XLSX]

## Sheet: marker genes
Table S2. The marker genes of immune signatures and pathway genes.
Immune signatures																												Pathway genes
Activated B cell	Activated CD4 T cell	Activated CD8 T cell	Activated dendritic cell	CD56bright natural killer cell	CD56dim natural killer cell	Central memory CD4 T cell	Central memory CD8 T cell	Effector memeory CD4 T cell	Effector memeory CD8 T cell	Eosinophil	Gamma delta T cell	Immature B cell	Immature dendritic cell	Macrophage	Mast cell	MDSC	Memory B cell	Monocyte	Natural killer cell	Natural killer T cell	Neutrophil	Plasmacytoid dendritic cell	Regulatory T cell	T follicular helper cell	Type 1 T helper cell	Type 17 T helper cell	Type 2 T helper cell	PD-L1 expression and PD-1 checkpoint pathway in cancer	Antigen processing and presentation	Apoptosis	JAK-STAT signaling pathway
ADAM28	AIM2	ADRM1	ABCD1	ABAT	CYP27A1	ABHD3	ACTN4	ATM	ACAP1	GIPR	ACP5	CD22	ACADM	AIF1	ADAMTS3	CCR2	AICDA	ASGR2	AKT3	BTN2A2	CREB5	CBX6	CCL3L1	B3GAT1	CD70	IL17A	ASB2	HIF1A	IFNG	TNFSF10	IL2
CD180	BIRC3	AHSA1	C1QC	C11orf75	DDX55	AHNAK	ADAM12	CASP3	APOL3	KRT18P50	AQP9	CYBB	AHCYL1	CCL1	CPA3	CD14	CCNA2	CFP	AXL	CD101	CDA	DAB2	CD72	CDK5R1	TBX21	IL17RA	CSRP2	EGF	TNF	TNFRSF10A	IL3
CD79B	BRIP1	C1GALT1C1	CAPG	C5orf15	DYRK2	ANXA2P2	ADCY9	CASQ1	ARHGAP10	LRMP	BTN3A2	FAM129C	ALDH1A2	CCL14	CMA1	CD2	CDKN3	ASGR1	BST2	CD109	CHST15	DDX17	CLEC5A	PDCD1	ADAM8	C2CD4A	DAPK1	EGFR	PSME1	TNFRSF10B	IL4
BLK	CCL20	CCT6B	CCL3L3	CDHR1	RPL37A	AQP3	F13A1	CD300E	ATP10D	FOSB	C1orf54	FCRL1	ALDH3A2	CCL23	CTSG	CD86	CLCN5	CD1D	CDH2	CNPY3	S100A12	HIGD1A	FOXP3	BCL6	AHCYL2	C2CD4B	DLC1	HRAS	PSME2	FASLG	IL5
CD19	CCL4	CD37	CD207	DCAF12	NOTCH3	ATHL1	FCER1G	DARS	C3AR1	RRP12	CARD8	FCRL3	ALDH9A1	CCL26	ARHGAP15	CXCR4	ENPP1	UPK3A	CRTAM	CNPY4	APOBEC3A	IDH3A	ITGA4	CD200	ALCAM	CA2	DNAJC12	KRAS	PSME3	FAS	IL6
MS4A1	CCL5	CD3D	CD302	DYNLL1	AKR7A3	BMI1	FCGR3B	DOCK9	CCR5	GPR183	CCL18	FCRL5	ALOX15	CD300LB	CPM	FCGR2A	FCER1A	ACTG1	CSF2RA	CREB1	CASP5	IL3RA	L1CAM	CD83	B3GALNT1	CCDC65	DUSP6	NRAS	HSPA8	FADD	IL7
TNFRSF17	CCNB1	CD3E	ATP5B	GPR137B	GPRC5C	BZW2	FGF7	EXOSC9	CD160	NR4A3	CD209	FCRLA	AMT	CNR1	FCN1	FCGR2B	FCRL4	ANXA5	CTSZ	CRTC2	MMP25	MAGED1	LIPA	CD84	BBS12	CEACAM3	GNAI1	RAF1	HSPA1A	TNF	IL9
IGHM	CCR7	CD3G	ATP5L	HCP5	GRIN1	CD63	FKBP4	EZH2	CD55	ST3GAL6	CD33	HDAC9	ARL1	CNR2	FTL	FCGR3A	MYC	ATP6V1B2	CXCL1	CRTC3	HAL	NUCB2	LRP1	FGF2	BST1	IL17C	LAMP3	MAP2K1	HSPA2	TNFRSF1A	IL10
GNG7	DUSP2	CD69	ATP6V1A	HDGFRP2	HLA-E	COL4A1	GLUD1	GDE1	CFLAR	DEPDC5	CD36	HLA-DQA1	ATIC	EIF1	HSPA6	FERMT3	RUNX2	CFL1	CYTH1	CSF2	C1orf183	OFD1	LRRC42	GPR18	CD151	IL17F	NRP2	MAP2K2	HSPA1L	TRADD	IL11
MICAL3	ESCO2	CD8A	BCL2L1	KRT86	PORCN	CYLD	GM2A	IL34	CMKLR1	PDE6C	CDK5	HVCN1	ATP5A1	EIF4A1	ITGA9	GPSM3	SORL1	DAZAP2	DAXX	KLRC1	FFAR2	OGT	MARCO	CEBPA	CD47	IL17RC	OSBPL1A	MAPK1	HSPA1B	CFLAR	IL12A
SPIB	ETS1	CETN3	C1QB	MLST8	PSMC4	ELMO2	GUSB	NCOA4	DAPP1	PKD2L2	IL10RB	KIAA0226	CAPZA1	FPR1	RNASE3	IL18BP	SOX5	CTBS	DGKH	FUT4	MAK	PDIA4	MMP12	CECR1	CD48	IL17RE	PDE4B	MAPK3	HSPA6	CASP8	IL12B
HLA-DOB	EXO1	CSE1L	SNURF	ELMOD3	UPP1	FYN	IL1RN	NEFL	FCRL6	GPR65	KLRF1	NCF1	LILRA5	FPR2	S100A4	IL4R	STAT5A	EMR4P	DLL4	ICAM2	CXCR1	SERTAD2	MNDA	CLEC10A	CD52	IL23A	PHLDA1	FOS	HSPA4	CASP10	IL13
IGKC	EXOC6	GEMIN6	SPCS3	ENTPD5	IL21R	GLIPR1	NOL11	PDGFRL	FLT3LG	IL5RA	LGALS1	NCF1B	RDX	FRAT2	SIGLEC8	ITGAL	STAT5B	HIVEP2	DPYD	IL32	STEAP4	SIRPA	MRC1	CLEC4A	CD53	ILDR1	PLA2G4A	JUN	HSP90AA1	CASP6	IL15
PNOC	IARS	GNLY	CCNA1	FAM119A	KIR2DS1	GSS	NTRK1	PTGS1	GZMM	P2RY14	MAPK7	P2RY10	RRAGD	GPR27	SLC6A4	ITGAM	TLR9	MARCKSL1	ERBB3	LAMP2	MGAM	TMED2	MS4A6A	CSF1R	CD59	LONRF3	RAB27B	EML4	HSP90AB1	CASP3	IL17D
FCRL2	ITK	GPT2	CEACAM8	FAM179A	KIR2DS2	IFITM2	RARA	REPS1	HAPLN3	DACH1	KLHL7	SP100	TACSTD2	GPR77	PTGS2	PARVG		MBP	F11R	LILRB5	BTNL8	ENG	PELO	CTSS	CD6	SH2D6	RBMS3	ALK	HLA-A	CASP7	IL19
BACH2	KIF11	GZMA	NOS2	CLIC2	KIR2DS5	ITGB1	RNF128	SCG2	HLA-DMB	DAPK2	KRT80	TXNIP	INPP5F	RNASE2	EGR3	PSAP		MMP15	FAM27A	KLRG1	CXCR2	FCAR	PLEK	DMN	CD68	TNIP2	RNF125	PIK3R1	HLA-B	BID	IL20
CR2	KNTC1	GZMH	SRA1	COX7A2L		ITGB2	SIGLEC1	SDPR	HLA-DPA1	EMR3	LAMC1	STAP1	RAB38	MS4A2	PILRA	PTGER2		PNPLA6	FAM49A	HSPA4	TNFRSF10C	IGF1	PRSS23	DPP4	CD7	ABCA1	TMPRSS3	PIK3R2	HLA-C	BAX	IL21
TCL1A	NUF2	GZMK	TNFRSF6B	CREB3L4		KLF5	TNFRSF11A	SIGLEC14	HLA-DPB1		LCORL	TAGAP	PLAU	BASP1		PTGES2		TMBIM6	FASLG	HSPB6	VNN3	ITGA2B	PTGIR	LRRC32	CD96	ABCB1	GATA3	PIK3R3	HLA-F	BAK1	IL22
AKNA	PRC1	IL2RB	TREM1	CSF1		LSP1	TOX4	SIGLEC6	IFI16		LMNB1	ZCCHC2	CSF3R	IGSF6		S100A8		PQBP1	FCGR1A	ISM2		GABARAP	ST8SIA4	MC5R	CFHR3	ADAMTS12	BIRC5	PIK3CA	HLA-G	DIABLO	IL23A
ARHGAP25	PSAT1	LCK	TREML1	CSNK2A2		NDUFB9	UBA52	TAL1	LIME1		MEIS3P1		SLC18A2	HK3		S100A9		TEX264	FN1	ITIH2		GPX1	STAB1	MICA	CHRM3	ANK1	CDC25C	PIK3CD	HLA-E	SEPTIN4	IL24
CCL21	RGS1	MPZL1	RHOA	CSTA		PKM2	ULBP1	TFEC	LTK		MPL		AMPD2	VNN1				IKZF1	FSTL1	KDM4C		KRT23		NCAM1	CLEC7A	ANKRD22	CDC7	PIK3CB	HSPA5	HTRA2	IFNA1
CD27	RTKN2	NKG7	SLC25A37	CSTB		SFXN3		TIPIN	NFKBIA		FABP1		CLTB	FES					FUCA1	KIR2DS4		PROK2		NCR2	COL23A1	B3GALT2	CENPF	PTEN	CANX	CYCS	IFNA2
CD38	SAMSN1	PIK3IP1	TNFSF14	CTPS		SIRPG		TPK1	SETD7		FABP5		C1orf162	NPL					GBP3	KIRREL3		RALB		NRP1	COL4A4	CAMTA1	CXCR6	AKT1	B2M	APAF1	IFNA4
CLEC17A	SELL	PTRH2	TREML4	CTSD		SMAD4		UQCRB	SIK1		FADD			FZD2					GLS2	SDCBP		RETNLB		PDCD1LG2	COL5A3	CCR9	DHFR	AKT2	PDIA3	CASP9	IFNA5
CLEC9A	TRAT1	TIMM13	VNN2	FST		STX4		USP9Y	TRIB2		MFAP3L			FAM198B					GRB2	NFATC2IP		RNF141		PDCD6	DAB1	CD40	EVI5	AKT3	CALR	PRF1	IFNA6
CLECL1		ZAP70	XPO6	GATA2		TRADD		WIPF1			MINPP1			HNMT					LST1	MICB		SEC14L1		PRDX1	DLEU7	GPR44	GSTA4	MTOR	TAPBP	GZMB	IFNA7
			CLEC4C	GMPR		VIM		ZCRB1			RPS24			SLC15A3					BCL2	KIR2DL1		SEPX1		RAE1	DOC2B	IFT80	HELLS	RPS6KB1	TAP1	TUBA1B	IFNA8
			TNFAIP2	HDC		XRCC6					RPS7			CD4					CDC5L	KIR2DL3		EMP3		RAET1E	EMP1		IL26	RPS6KB2	TAP2	TUBA4A	IFNA10
			UBD	HEY1							RPS9			TXNDC3					FGF18	KIR3DL1		CD300LF		SIGLEC7	F12		LAIR2	CHUK	CD8A	TUBA3C	IFNA13
			ACTR3	HOXA1							DBNL			FRMD4A					FUT5	KIR3DL2		ABTB1		SIGLEC9	FURIN			IKBKB	CD8B	TUBA1A	IFNA14
			RAB1A	HS2ST1							CCL13			CRYBB1					FZR1	NCR1		KLHL21		TYRO3	GAB3			IKBKG	CD8B2	TUBA1C	IFNA16
			SLA	HS3ST1										HRH1					GAGE2	FOSL1		PHRF1		CHST12	GATM			NFKBIA	KIR3DL2	TUBA8	IFNA17
			HLA-DQA2	BCL11B										WNT5B					IGFBP5	TSLP				CLIC3	GFPT2			NFKBIB	KIR3DL1	TUBA3E	IFNA21
			SIGLEC5	CDH3															KANK2	SLC7A7				IVNS1ABP	GPR25			NFKBIE	KIR3DL3	TUBA3D	IFNB1
			SLAMF9	MYL6B															LDB3	SPP1				KIR2DL2	GREM2			NFKB1	KIR2DL2	TUBAL3	IFNG
				NAA16																TREM2				LGMN	HAVCR1			RELA	KIR2DL1	MCL1	IFNE
				ClQA																UBASH3A					HSD11B1			IFNG	KIR2DL3	ACTG1	IFNK
				ClQB																YBX2					HUNK			IFNGR1	KIR2DL4	ACTB	IFNL1
				CYP27B1																CCDC88A					IGF2			IFNGR2	KIR2DL5A	SPTA1	IFNL2
				EIF3M																CLEC1A					RCSD1			JAK1	KLRC1	SPTAN1	IFNL3
																				THBD					RYR1			JAK2	KLRC2	LMNA	IFNW1
																				PDPN					SAV1			STAT1	KLRC3	LMNB1	OSM
																				VCAM1					SELE			STAT3	KLRC4	LMNB2	LIF
																				EMR1					SELP			TLR2	KLRD1	PARP1	TSLP
																									SH3KBP1			TLR4	KIR2DS1	PARP2	CTF1
																									SIT1			TLR9	KIR2DS3	PARP3	CSF2
																									SLC35B3			TIRAP	KIR2DS4	PARP4	CNTF
																									SIGLEC10			MYD88	KIR2DS5	DFFA	CSF3
																									SKAP1			TRAF6	KIR2DS2	DFFB	EPO
																									THUMPD2			NFATC1	IFI30	ENDOG	GH1
																									TIGIT			NFATC2	LGMN	AIFM1	GH2
																									ZEB2			NFATC3	CTSB	ERN1	CSH1
																									ENC1			TICAM1	HLA-DMA	TRAF2	CSH2
																									FAM134B			TICAM2	HLA-DMB	ITPR1	LEP
																									FBXO30			CD274	HLA-DOA	ITPR2	THPO
																									FCGR2C			PDCD1	HLA-DOB	ITPR3	PRL
																									STAC			PTPN6	HLA-DPA1	CAPN1	EGF
																									LTC4S			PTPN11	HLA-DPB1	CAPN2	PDGFA
																									MAN1B1			BATF3	HLA-DQA1	CASP12	PDGFB
																									MDH1			BATF	HLA-DQA2	EIF2AK3	IL2RA
																									MMD			BATF2	HLA-DQB1	EIF2S1	IL2RB
																									RGS16			CSNK2A1	HLA-DRA	ATF4	IL2RG
																									IL12A			CSNK2A2	HLA-DRB1	DDIT3	IL3RA
																									P2RX5			CSNK2A3	HLA-DRB3	CTSB	IL4R
																									CD97			CSNK2B	HLA-DRB4	CTSC	IL5RA
																									ITGB4			CD4	HLA-DRB5	CTSD	IL6R
																									ICAM3			LCK	CD74	CTSF	IL7R
																									METRNL			CD3E	CTSL	CTSH	IL9R
																									TNFRSF1A			CD3G	CTSS	CTSK	IL10RA
																									IRF1			CD247	CD4	CTSL	IL10RB
																									HTR2B			CD3D	CIITA	CTSO	IL11RA
																									CALD1			ZAP70	RFX5	CTSS	IL12RB1
																									MOCOS			MAP3K3	RFXANK	CTSV	IL12RB2
																									TRAF3IP2			MAP2K3	RFXAP	CTSW	IL13RA1
																									TLR8			MAP2K6	CREB1	CTSZ	IL13RA2
																									TRAF1			MAPK11	NFYA	BIRC2	IL15RA
																									DUSP14			MAPK12	NFYB	BIRC3	IL20RA
																												MAPK13	NFYC	XIAP	IL20RB
																												MAPK14		BIRC5	IL21R
																												LAT		BCL2L11	IL22RA1
																												PLCG1		BCL2L1	IL22RA2
																												PPP3CA		BCL2	IL23R
																												PPP3CB		DAXX	IL27RA
																												PPP3CC		RIPK1	IL6ST
																												PPP3R1		DAB2IP	IFNAR1
																												PPP3R2		MAP3K5	IFNAR2
																												RASGRP1		MAPK8	IFNGR1
																												CD28		MAPK10	IFNGR2
																												PRKCQ		MAPK9	IFNLR1
																														BAD	OSMR
																														JUN	LIFR
																														FOS	CRLF2
																														TP53	CNTFR
																														HRK	CSF2RA
																														MAP3K14	CSF2RB
																														CHUK	CSF3R
																														IKBKB	EPOR
																														IKBKG	GHR
																														NFKBIA	LEPR
																														NFKB1	MPL
																														RELA	PRLR
																														PTPN13	EGFR
																														GADD45A	PDGFRA
																														GADD45B	PDGFRB
																														GADD45G	JAK1
																														TRAF1	JAK2
																														BCL2A1	JAK3
																														ATM	TYK2
																														PIDD1	STAT1
																														TP53AIP1	STAT2
																														BBC3	STAT3
																														PMAIP1	STAT4
																														CASP2	STAT5A
																														NGF	STAT5B
																														NTRK1	STAT6
																														IL3	CISH
																														IL3RA	SOCS1
																														CSF2RB	SOCS2
																														PIK3CA	SOCS3
																														PIK3CD	SOCS4
																														PIK3CB	SOCS5
																														PIK3R1	SOCS7
																														PIK3R2	SOCS6
																														PIK3R3	BCL2
																														PDPK1	MCL1
																														AKT1	BCL2L1
																														AKT2	PIM1
																														AKT3	MYC
																														HRAS	CCND1
																														KRAS	CCND2
																														NRAS	CCND3
																														RAF1	CDKN1A
																														MAP2K1	AOX1
																														MAP2K2	GFAP
																														MAPK1	STAM2
																														MAPK3	STAM
																															PTPN2
																															PTPN6
																															IRF9
																															CREBBP
																															EP300
																															PIAS1
																															PIAS2
																															PIAS3
																															PIAS4
																															FHL1
																															PTPN11
																															GRB2
																															SOS1
																															SOS2
																															HRAS
																															RAF1
																															PIK3CA
																															PIK3CD
																															PIK3CB
																															PIK3R1
																															PIK3R2
																															PIK3R3
																															AKT1
																															AKT2
																															AKT3
																															MTOR
